# Supplementary material
Source: PubMed Central journal article supplement (PMC2323320)

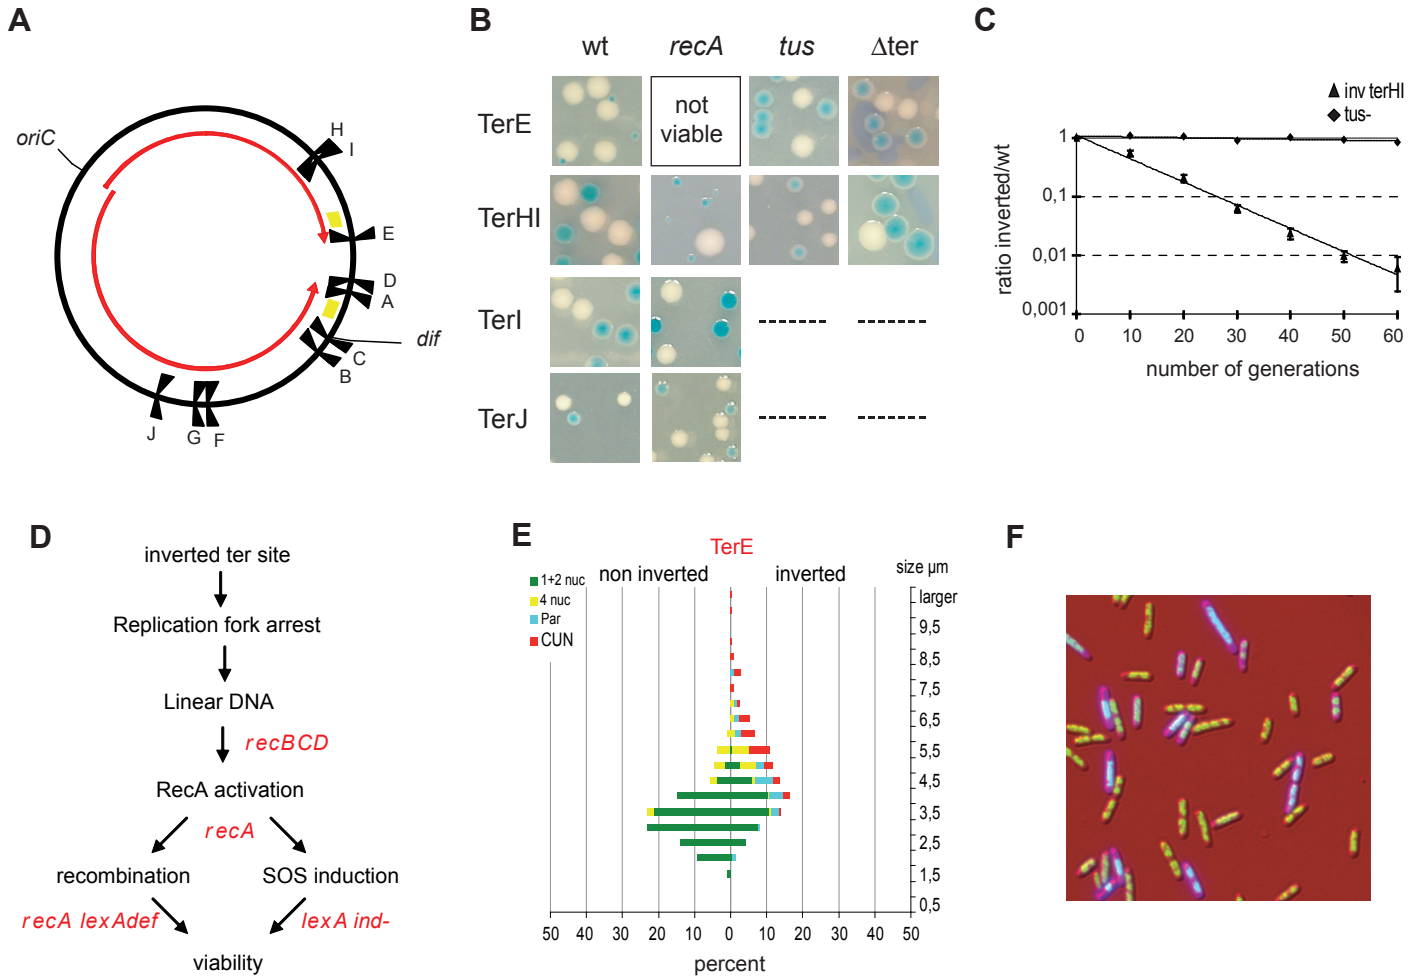

Figure S1

Supplement: pgen.0030226.sg001.pdf [file pgen.0030226.sg001.pdf]
